# Supplementary material for: Effects of a High-Protein Diet on Cardiometabolic Health, Vascular Function, and Endocannabinoids—A PREVIEW Study
Source: MDPI journal article supplement (doi:10.3390/nu12051512), 2020-05-22
Supplement: s1 [file s1]

**Table S1.** Subject characteristics of the moderate- and high-protein group at prior to the respiration chamber stay

|                          | <b>Moderate protein</b> | <b>High protein</b> |
|--------------------------|-------------------------|---------------------|
| N (f/m)                  | 18 (9/9)                | 20 (13/7)           |
| Age (year)               | 65.1 ± 5.8              | 64.0 ± 6.2          |
| BMI (kg/m <sup>2</sup> ) | 29.0 ± 3.8              | 28.9 ± 4.0          |
| Body-fat (%)             | 39.5 ± 8.1              | 40.7 ± 7.7          |
| Fat mass (kg)            | 33.9 ± 7.1              | 34.8 ± 8.8          |
| Fat-free mass (kg)       | 52.5 ± 10.9             | 50.8 ± 11.3         |

Values are means ± SD. BMI = Body Mass Index.

**Table S2.** Office blood pressure at pre- and post-respiration chamber time points with a moderate- or high-protein diet

|                     | <b>Moderate protein<br/>(n=18)</b> |                   | <b>High protein<br/>(n=20)</b> |                   | <b>Treatment<br/>effect</b>          |
|---------------------|------------------------------------|-------------------|--------------------------------|-------------------|--------------------------------------|
|                     | Pre <sup>1</sup>                   | Post <sup>1</sup> | Pre <sup>1</sup>               | Post <sup>1</sup> | Difference in<br>change <sup>2</sup> |
| Brachial SBP (mmHg) | 126±10                             | 127±10            | 130±11                         | 127±12            | -2 [-8; 3]                           |
| Brachial DBP (mmHg) | 77±7                               | 77±6              | 78±6                           | 76±7              | -2 [-5; 2]                           |
| Brachial MAP (mmHg) | 93±7                               | 93±6              | 95±7                           | 93±8              | -2 [-5; 2]                           |
| Brachial PP (mmHg)  | 49±7                               | 50±10             | 52±10                          | 51±9              | -1 [-5; 4]                           |
| HR (bpm)            | 62±9                               | 57±6              | 65±7                           | 62±6              | 3 [0; 6]                             |

<sup>1</sup>Values are means±SDs. <sup>2</sup> treatment effects [95% CI] were obtained from a one-factor ANCOVA with baseline value as covariate. BP = blood pressure; SBP = systolic blood pressure; DBP = diastolic blood pressure; HR = heart rate; bpm.: beats per minute.
